# Supplementary material
Source: HighWire-hosted journal article supplement (https://heart.bmj.com/highwire/filestream/125169/field_highwire_adjunct_files/0/944445webonlyfig.pdf)

B F 3.5 MHz G MAX  
P 13 cm  
PRC 6-B-B PRS 1  
PST 1  
SV 4- 53mm

PW F 2.5 MHz G 80%  
PRF 8.3kHz  
PRC 6-1  
PST 2  
FP 100 Hz

+1.28

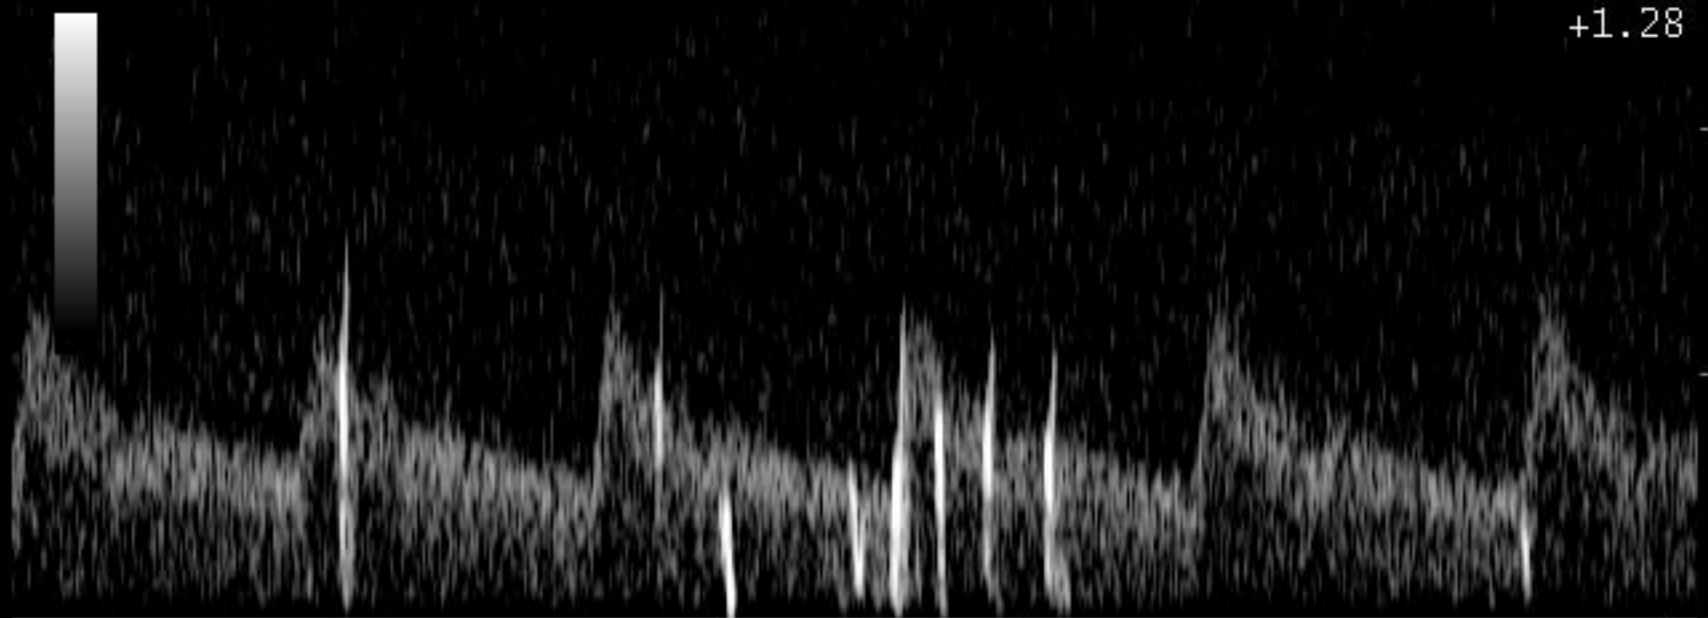

m/s

FC 77

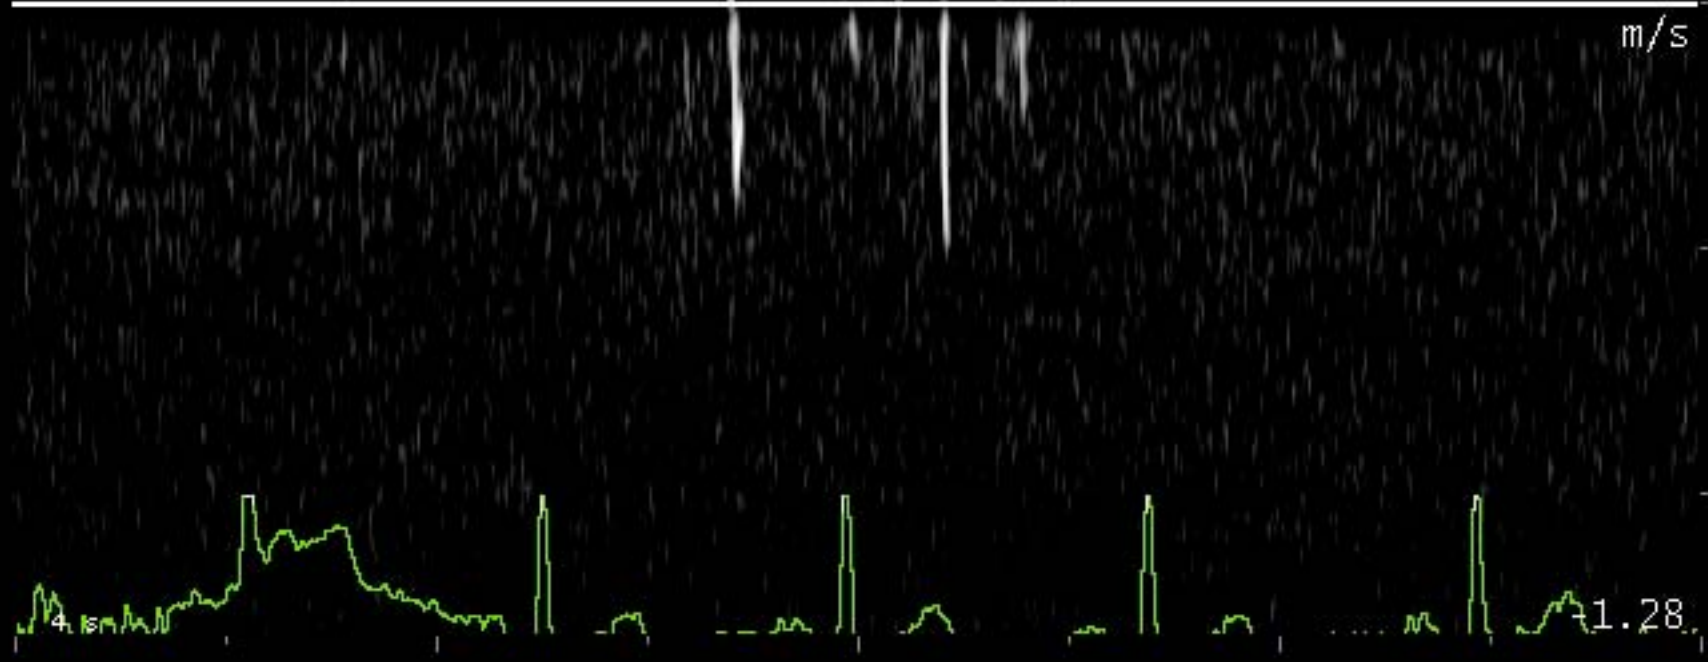

Supplement: 944445webonlyfig.pdf [file 944445webonlyfig.pdf]
